# Supplementary material
Source: Springer Nature journal article supplement (https://www.springermedizin.de/resource/supplementary/12967_2010_688_MOESM3_ESM.pdf/9577200)

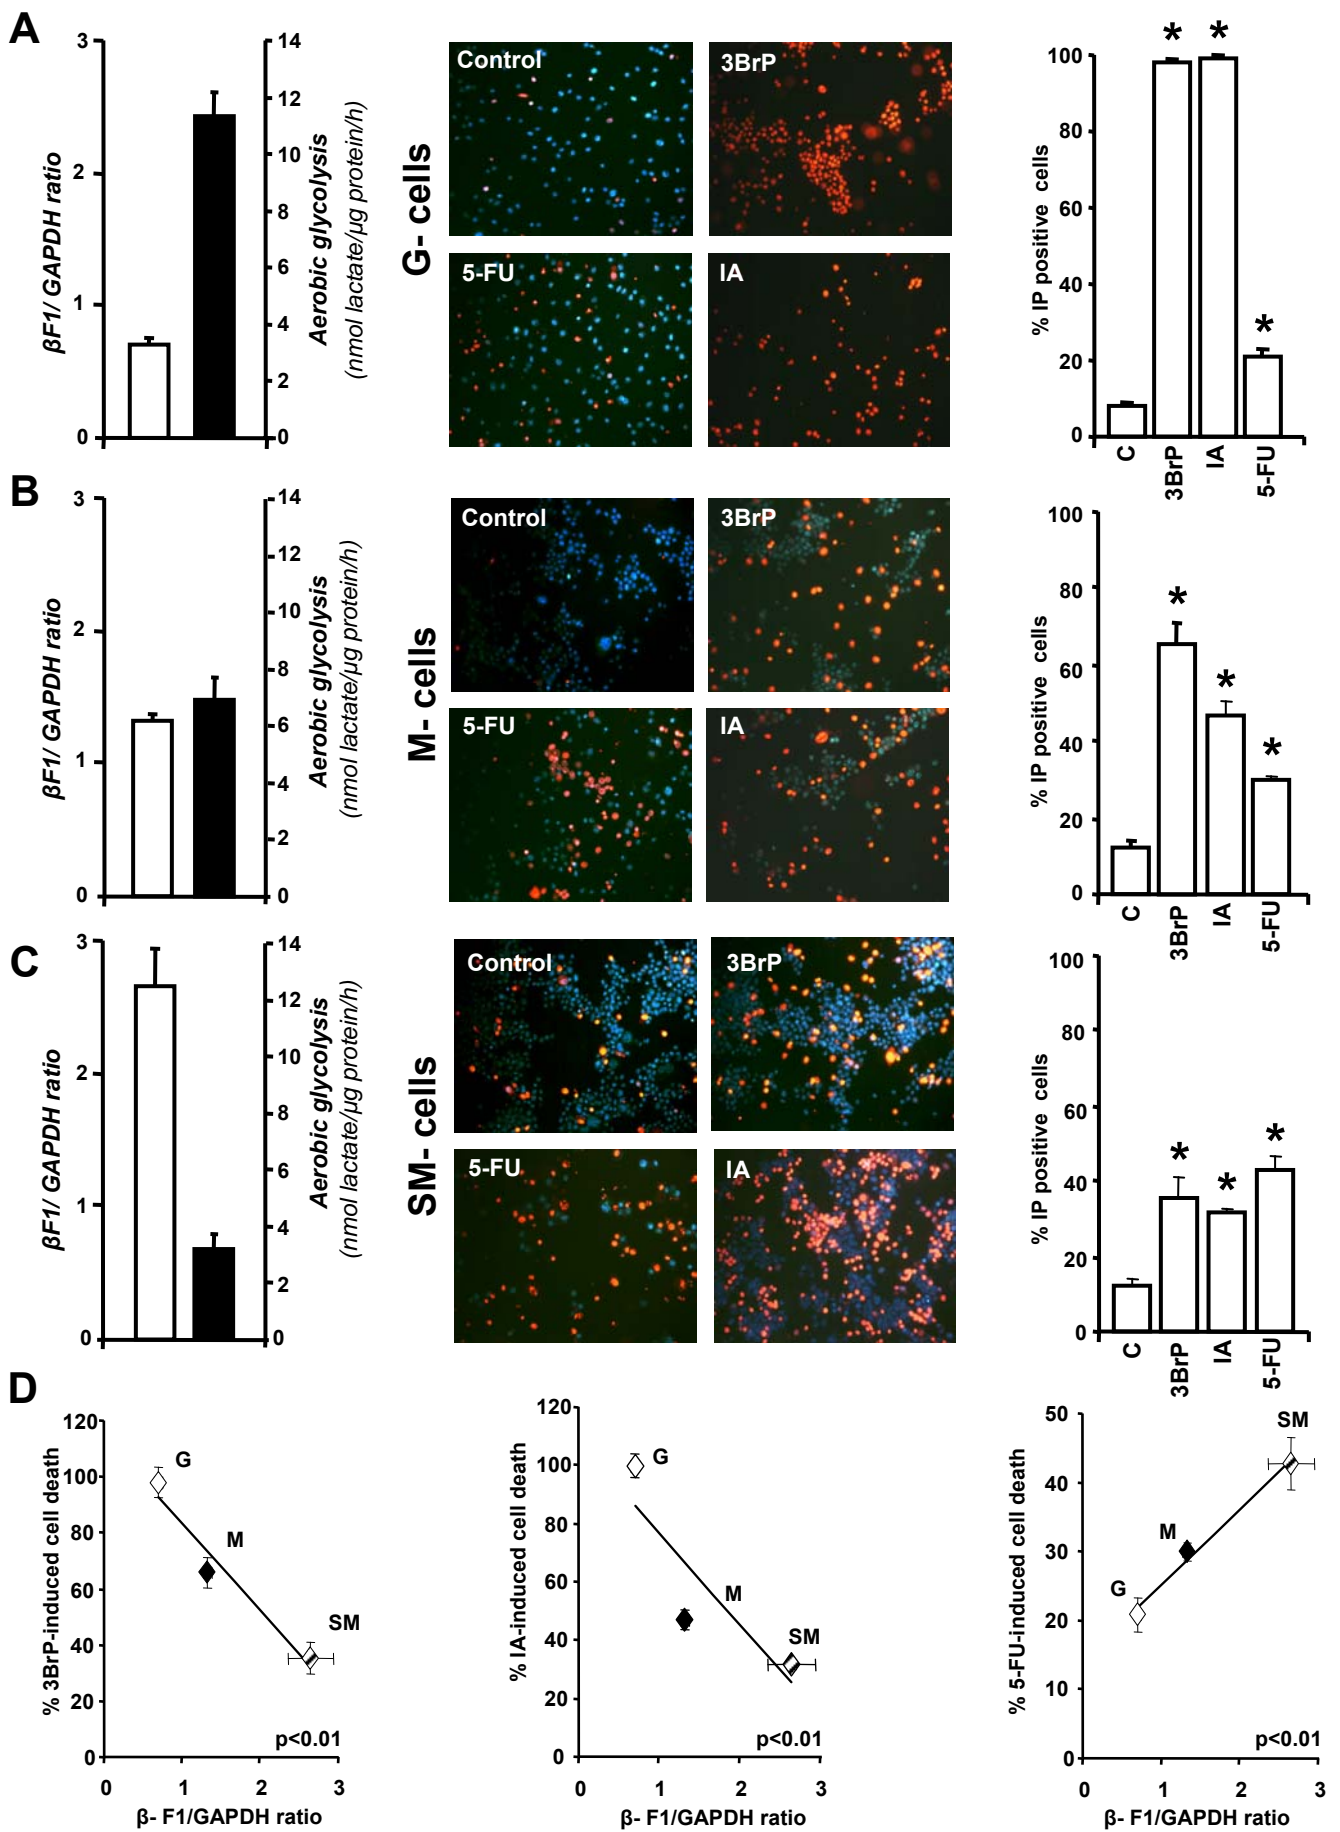

Supplement: MOESM3 [file 9577200]
